# Supplementary material for: Doped hexa-peri-hexabenzocoronene as anode materials for lithium- and magnesium-ion batteries
Source: Royal Society of Chemistry journal article supplement (doi:10.1039/d4cp04101a), 2024-12-04
Supplement: d4cp04101a1.pdf [file d4cp04101a1.pdf]

# Doped Hexa-*peri*-hexabenzocoronene as Anode Material in Lithium- and Magnesium-Ion Batteries

Remya Geetha Sadasivan Nair\*, Arun Kumar Narayanan Nair\*, Bicheng Yan\*, and Shuyu Sun\*

Physical Science and Engineering Division (PSE), Computational Transport Phenomena Laboratory, King Abdullah University of Science and Technology (KAUST), Thuwal, 23955-6900, Saudi Arabia.

\* To whom correspondence should be addressed,

email: [remya.nair@kaust.edu.sa](mailto:remya.nair@kaust.edu.sa); [arun.narayanannair@kaust.edu.sa](mailto:arun.narayanannair@kaust.edu.sa); [bicheng.yan@kaust.edu.sa](mailto:bicheng.yan@kaust.edu.sa); [shuyu.sun@kaust.edu.sa](mailto:shuyu.sun@kaust.edu.sa)

Table S1. Comparison of our results for adsorption energies with literature values.

Adsorption energies in kcal/mol.

| system                                                                         | literature | our study | % difference |
|--------------------------------------------------------------------------------|------------|-----------|--------------|
| Li <sup>+</sup> /C <sub>36</sub> H <sub>18</sub> B <sub>3</sub> N <sub>3</sub> | -47.9      | -50.81    | -6.08        |
| Li/C <sub>36</sub> H <sub>18</sub> B <sub>3</sub> N <sub>3</sub>               | -25.2      | -16.40    | 34.92        |
| Li <sup>+</sup> /C <sub>42</sub> H <sub>18</sub>                               | -53.3      | -51.57    | 3.25         |
| Li/C <sub>42</sub> H <sub>18</sub>                                             | -13.8      | -17.39    | -26.01       |
| Mg/C <sub>42</sub> H <sub>18</sub>                                             | -4.10      | -3.17     | 22.68        |
| Mg <sup>2+</sup> /C <sub>42</sub> H <sub>18</sub>                              | -189.2     | -178.09   | 5.87         |

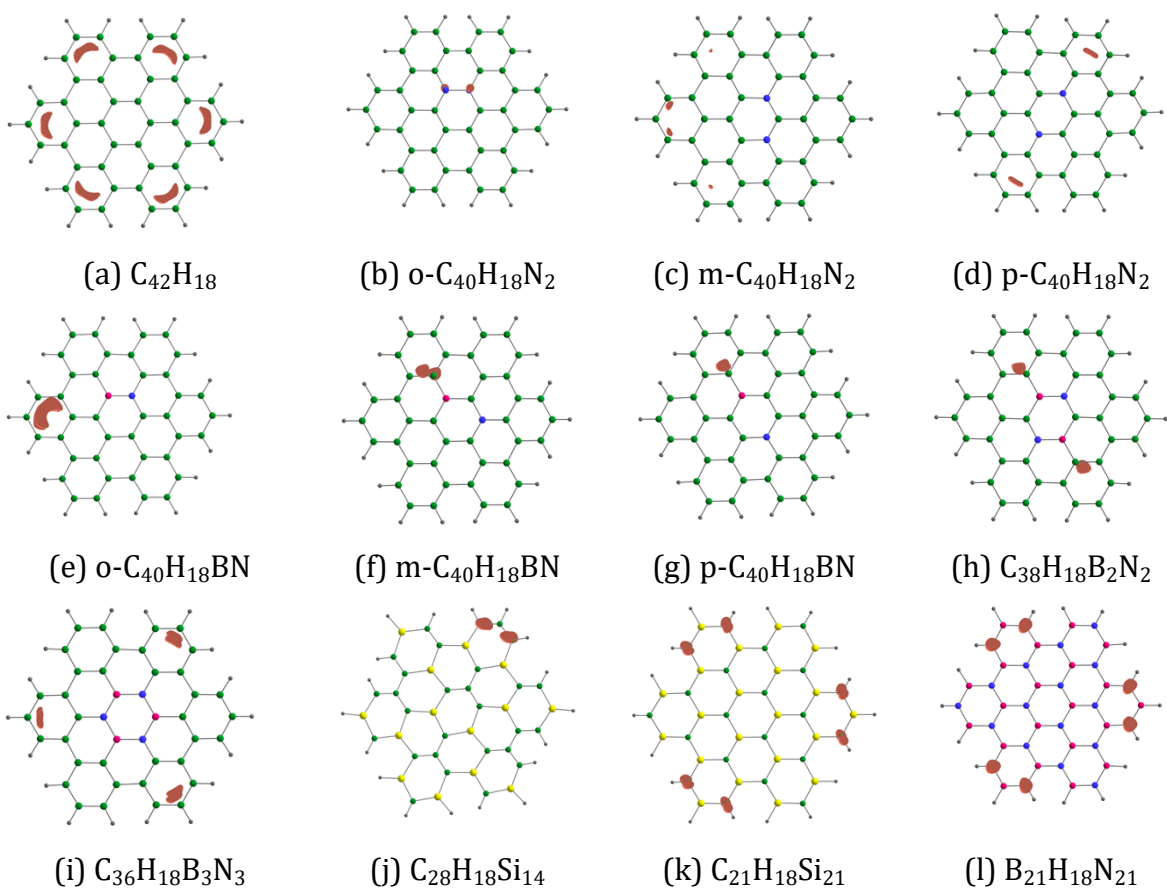

Figure S1. MESP  $V_{\min}$  features of (a)  $C_{42}H_{18}$ , (b)  $o-C_{40}H_{18}N_2$ , (c)  $m-C_{40}H_{18}N_2$  (d)  $p-C_{40}H_{18}N_2$ , (e)  $o-C_{40}H_{18}BN$ , (f)  $m-C_{40}H_{18}BN$ , (g)  $p-C_{40}H_{18}BN$ , (h)  $C_{38}H_{18}B_2N_2$ , (i)  $C_{36}H_{18}B_3N_3$ , (j)  $C_{28}H_{18}Si_{14}$ , (k)  $C_{21}H_{18}Si_{21}$ , (l)  $B_{21}H_{18}N_{21}$ .

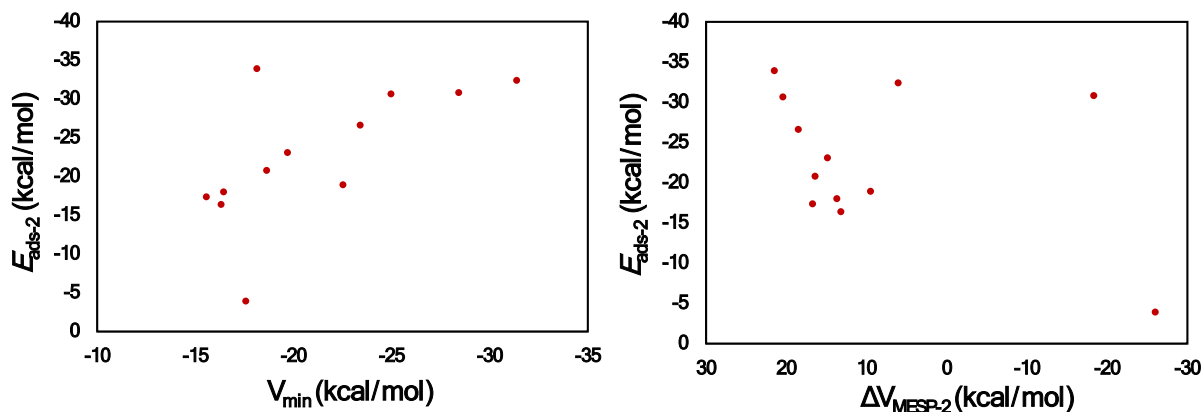

Figure S2. Correlation between (a)  $V_{\min}$  and  $E_{\text{ads-2}}$  and (b)  $\Delta V_{\text{MESP-2}}$  and  $E_{\text{ads-2}}$  for Li-adsorbed HBCs.

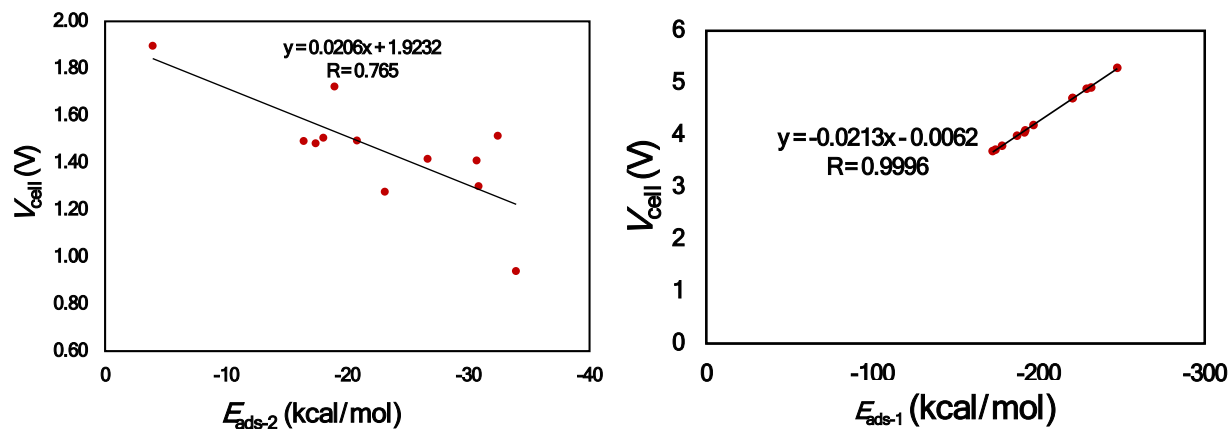

Figure S3. Correlation between (a)  $E_{\text{ads-2}}$  and  $V_{\text{cell}}$  for doped HBCs for LIBs and (b)  $E_{\text{ads-1}}$  and  $V_{\text{cell}}$  for doped HBCs for MIBs

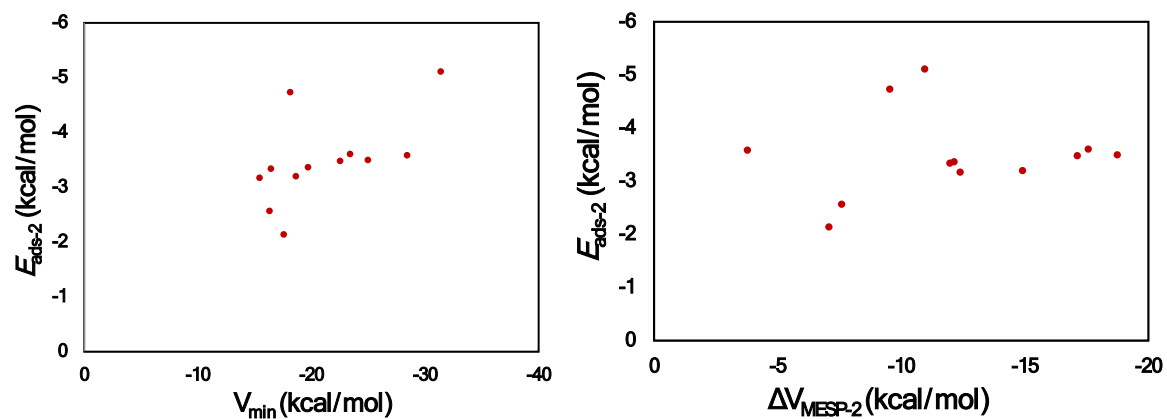

Figure S4. Correlation between (a)  $V_{\text{min}}$  and  $E_{\text{ads-2}}$  and (b)  $\Delta V_{\text{MESP-2}}$  and  $E_{\text{ads-2}}$  for Mg-adsorbed HBCs.
